# Supplementary material for: Copper catalyzed coupling of protecting group free and sterically hindered 2-bromobenzyl tertiary alcohols with phenols and anilines: facile synthesis of xanthenes and dihydroacridines
Source: Royal Society of Chemistry journal article supplement (doi:10.1039/c6ra03447k), 2016-01-01
Supplement: c6ra03447k1.pdf [file c6ra03447k1.pdf]

***Supporting information:***

**Copper Catalyzed Coupling of Protecting Group Free and Sterically Hindered 2-Bromobenzyl Tertiary Alcohols with Phenols and Anilines: Facile Synthesis of Xanthenes and Dihydroacridines**

Lodi Mahendar and Gedu Satyanarayana

Department of Chemistry, Indian Institute of Technology Hyderabad, Kandi – 502 285, Sangareddy, Telangana, INDIA

Phone: (040) 2301 6033; Fax: (040) 2301 6003/32

E-mail: [gvsatya@iith.ac.in](mailto:gvsatya@iith.ac.in)

| <b>Table of Contents</b>            | <b>Page</b> |
|-------------------------------------|-------------|
| The details of precursors synthesis | S2-S2       |
| X-ray data                          | S3-S5       |
| NMR Spectra                         | S6-S21      |

The following 2-bromobenzyl tertiary alcohols **1a-i**<sup>1</sup> are known in the literature (Table 1).

**Table: 1**

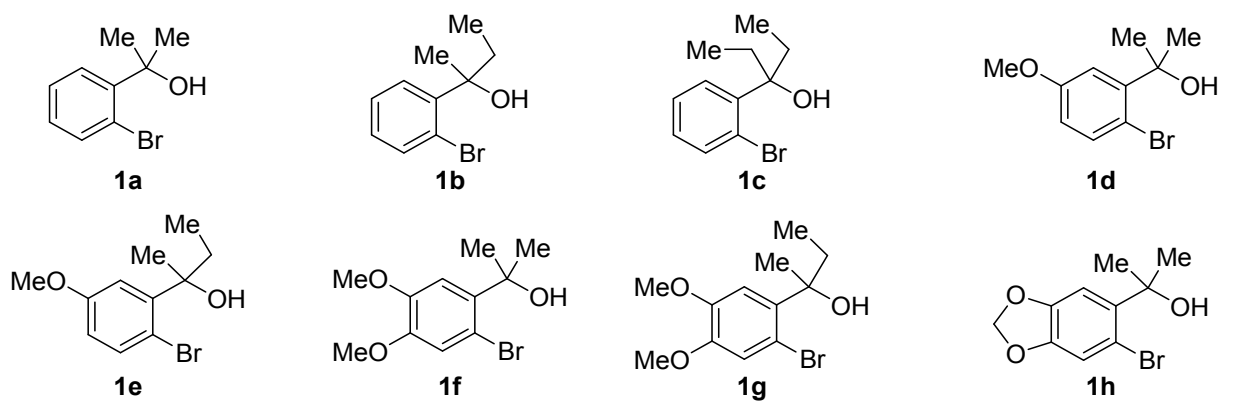

- 1) L. Mahendar, J. Krishna, A. G. K. Reddy, B. V. Ramulu and G. Satyanarayana, *Org. Lett.* 2012, **14**, 628.

The following molecules **27aa**,<sup>2</sup> **21aa**,<sup>3</sup> **22aa**<sup>4</sup> and **22ac**<sup>4</sup> are known in the literature (Table 2).

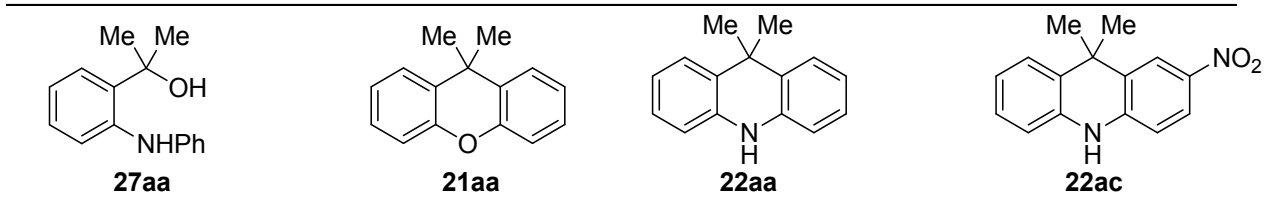

- 2) S. N. Bagriantsev, K. -H. Ang, A. Gallardo-Godoy, K. A. Clark, M. R. Arkin, A. R. Renslo, and D. L. Minor, Jr. *ACS Chem. Biol.* 2013, **8**, 1841.  
3) J. S. Nowick, P. Ballester, F. Ebmeyer, and J. Rebek, Jr. *J. Am. Chem. Soc.* 1990, **112**, 8902.  
4) T. L. Andrew and T. M. Swager, *J. Org. Chem.* 2011, **76**, 2976.

X-ray crystal structure data for the xanthene (**21ab**): CCDC 1446328

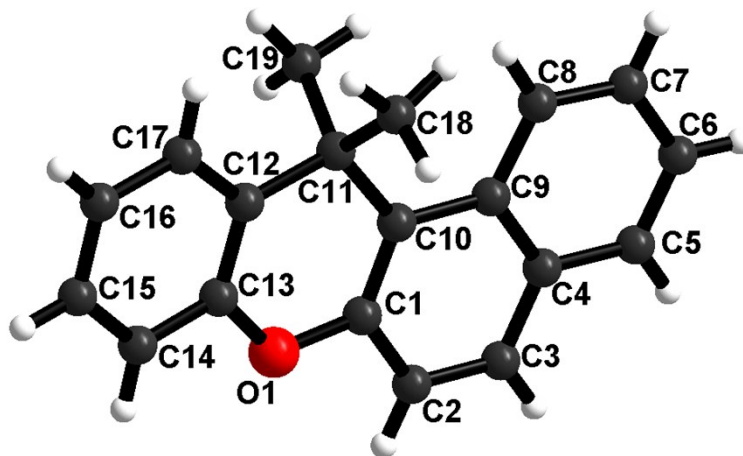

|                                       |                                         |
|---------------------------------------|-----------------------------------------|
| Operator                              | Ch. Nagababu                            |
| Diffractometer                        | Oxford Super Nova                       |
| CCDC                                  | 1446328                                 |
| Empirical formula                     | C <sub>19</sub> H <sub>16</sub> O       |
| Formula weight                        | 260.32                                  |
| Temperature/K                         | 293 (2)                                 |
| Crystal system                        | Trigonal                                |
| Space group                           | P 3 <sub>1</sub>                        |
| a/Å                                   | 20.6263(7)                              |
| b/Å                                   | 20.6263(7)                              |
| c/Å                                   | 8.4471(3)                               |
| α/°                                   | 90                                      |
| β/°                                   | 90                                      |
| γ/°                                   | 120                                     |
| Volume/Å <sup>3</sup>                 | 3112.29(19)                             |
| Z                                     | 9                                       |
| ρ <sub>calc</sub> /mg/mm <sup>3</sup> | 1.250                                   |
| m/mm <sup>-1</sup>                    | 0.585                                   |
| F(000)                                | 1242.0                                  |
| Crystal size/mm <sup>3</sup>          | 0.18 × 0.14 × 0.12                      |
| 2θ range for data collection          | 8.58 to 142.78°                         |
| Index ranges                          | -21 ≤ h ≤ 25, -25 ≤ k ≤ 20, -10 ≤ l ≤ 5 |
| Reflections collected                 | 6975                                    |
| Independent reflections               | 4791[R(int) = 0.0176]                   |
| Data/restraints/parameters            | 4791/1/547                              |
| Goodness-of-fit on F <sup>2</sup>     | 1.057                                   |
| Final R indexes [I ≥ 2σ (I)]          | R1 = 0.0468, wR2 = 0.1114               |
| Final R indexes [all data]            | R1 = 0.0531, wR2 = 0.1202               |

Largest diff. peak/hole / e Å<sup>-3</sup> 0.11/-0.20

X-ray crystal structure data for the dihydroacrididine (**22ac**): **CCDC 1446323**

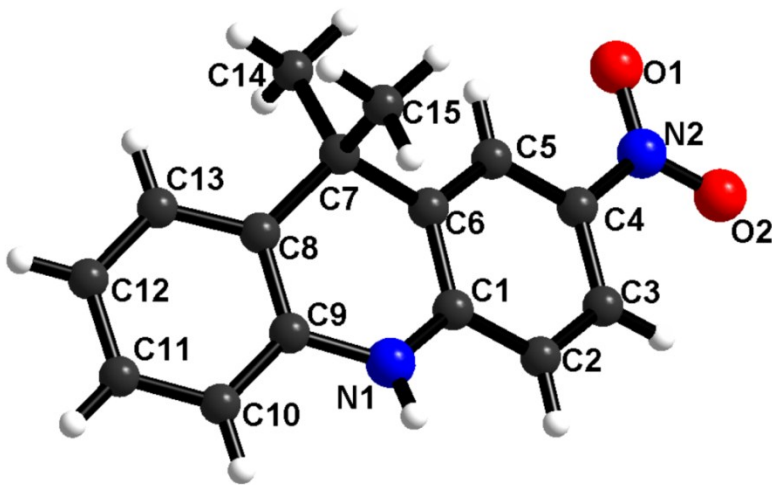

|                                       |                                                               |
|---------------------------------------|---------------------------------------------------------------|
| Operator                              | K. Srinivas                                                   |
| Diffractometer                        | Oxford Super Nova                                             |
| CCDC                                  | 1049624                                                       |
| Empirical formula                     | C <sub>15</sub> H <sub>14</sub> N <sub>2</sub> O <sub>2</sub> |
| Formula weight                        | 254.29                                                        |
| Temperature/K                         | 293                                                           |
| Crystal system                        | orthorhombic                                                  |
| Space group                           | Pbca                                                          |
| a/Å                                   | 9.3070(3)                                                     |
| b/Å                                   | 16.5482(5)                                                    |
| c/Å                                   | 32.8832(9)                                                    |
| α/°                                   | 90                                                            |
| β/°                                   | 90                                                            |
| γ/°                                   | 90                                                            |
| Volume/Å <sup>3</sup>                 | 5064.5(3)                                                     |
| Z                                     | 16                                                            |
| ρ <sub>calc</sub> /mg/mm <sup>3</sup> | 1.3339                                                        |
| m/mm <sup>-1</sup>                    | 0.730                                                         |
| F(000)                                | 2150.9                                                        |
| Crystal size/mm <sup>3</sup>          | 0.24 × 0.18 × 0.14                                            |
| 2θ range for data collection          | 10.7 to 141.6°                                                |
| Index ranges                          | -11 ≤ h ≤ 10, -17 ≤ k ≤ 20, -39 ≤ l ≤ 29                      |
| Reflections collected                 | 13211                                                         |
| Independent reflections               | 4806[R(int) = 0.0206]                                         |
| Data/restraints/parameters            | 4806/0/351                                                    |
| Goodness-of-fit on F <sup>2</sup>     | 1.067                                                         |
| Final R indexes [I ≥ 2σ (I)]          | R1 = 0.0485, wR2 = 0.1289                                     |

Final R indexes [all data] R1 = 0.0611, wR2 = 0.1424  
Largest diff. peak/hole / e Å<sup>-3</sup> 0.26/-0.16

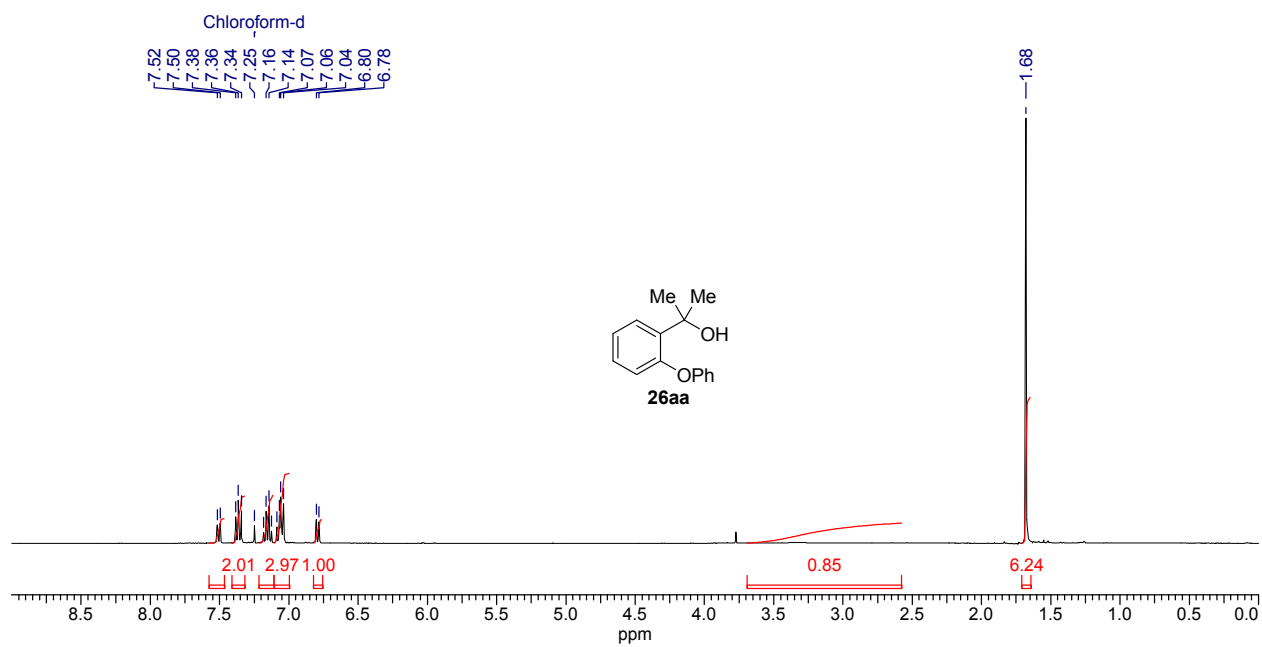

$^1\text{H}$  NMR (400 MHz) spectrum of **26aa** in  $\text{CDCl}_3$

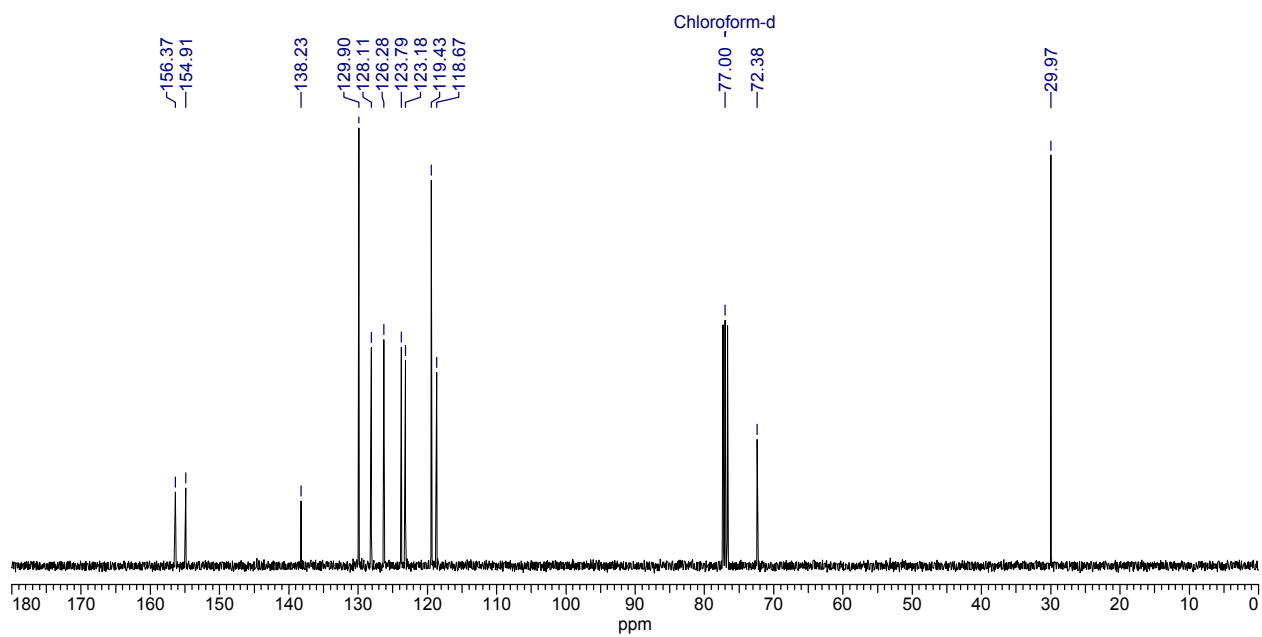

$^{13}\text{C}$  NMR (100 MHz) spectrum of **26aa** in  $\text{CDCl}_3$

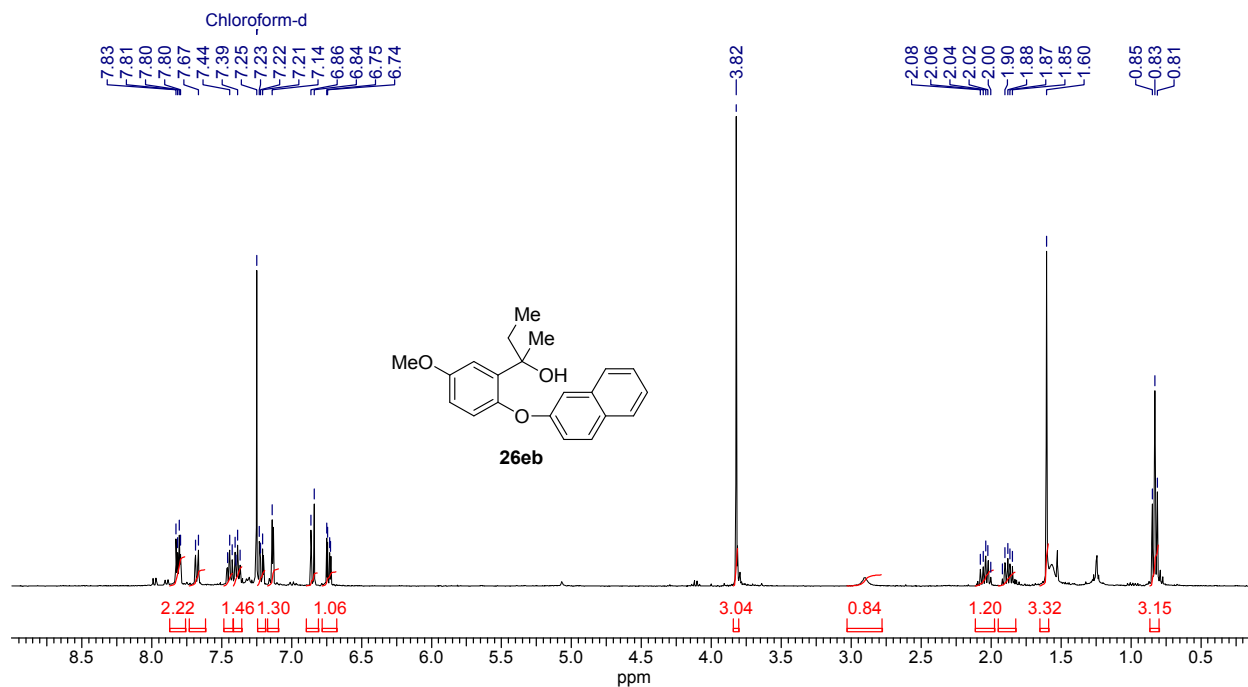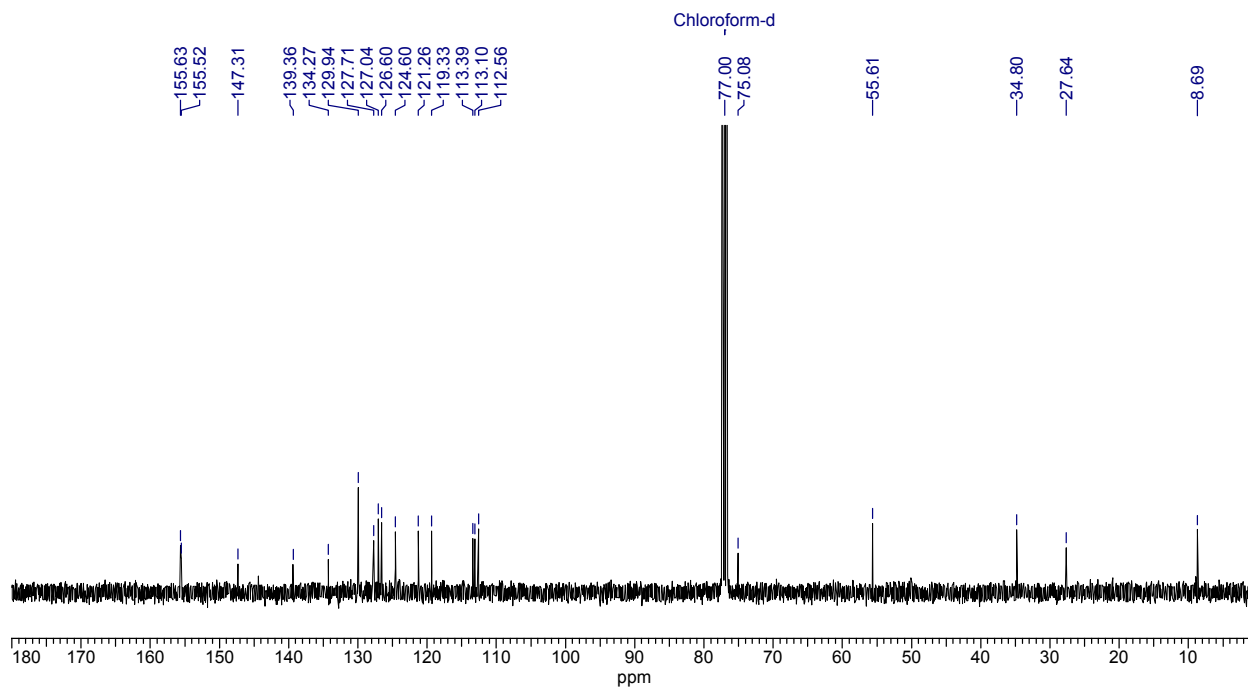

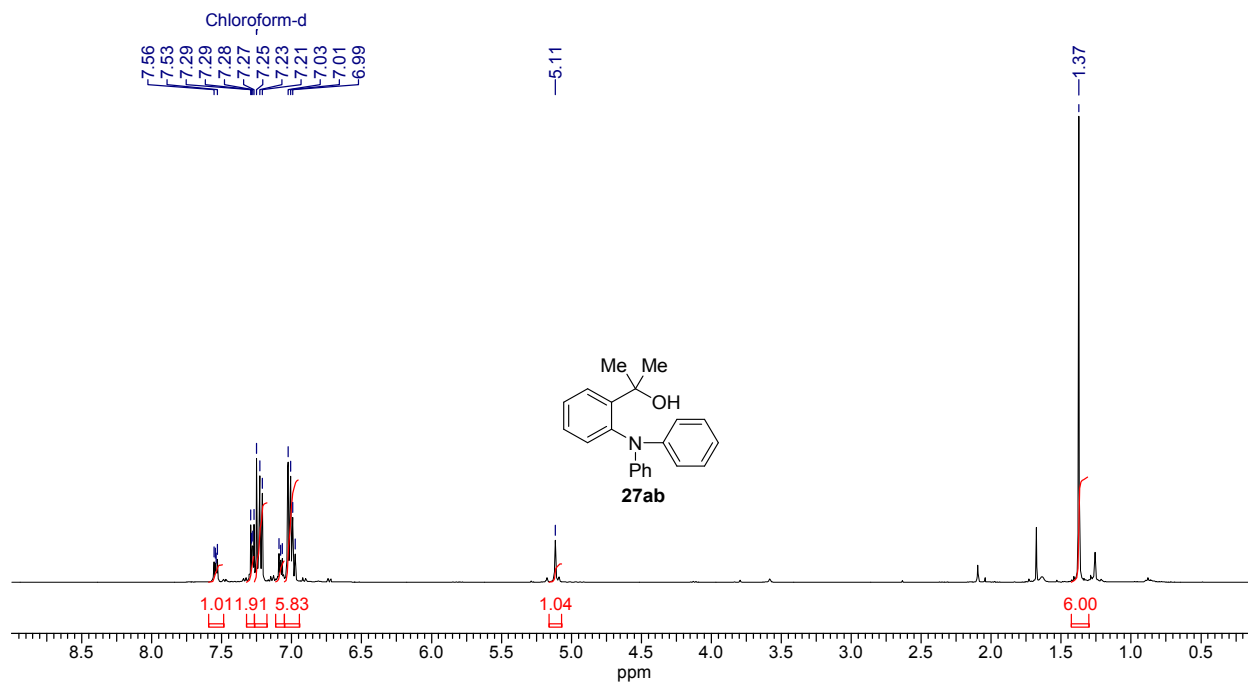

$^1\text{H}$  NMR (400 MHz) spectrum of **27ab** in  $\text{CDCl}_3$

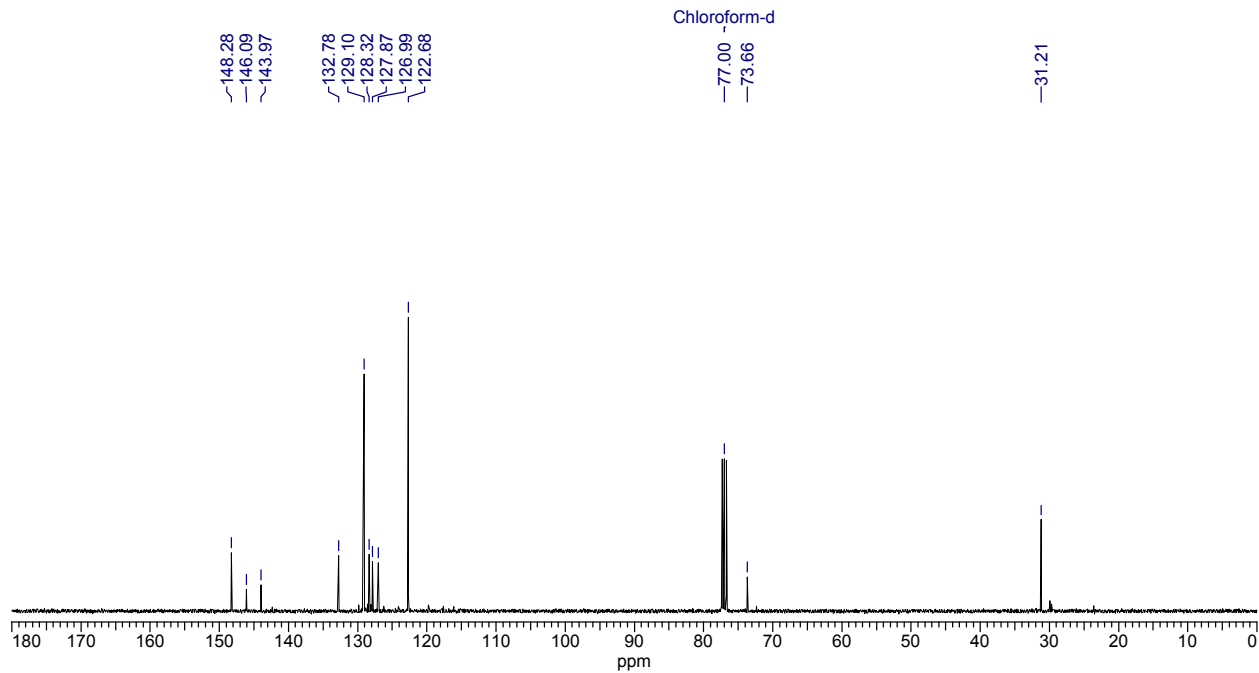

$^{13}\text{C}$  NMR (100 MHz) spectrum of **27ab** in  $\text{CDCl}_3$



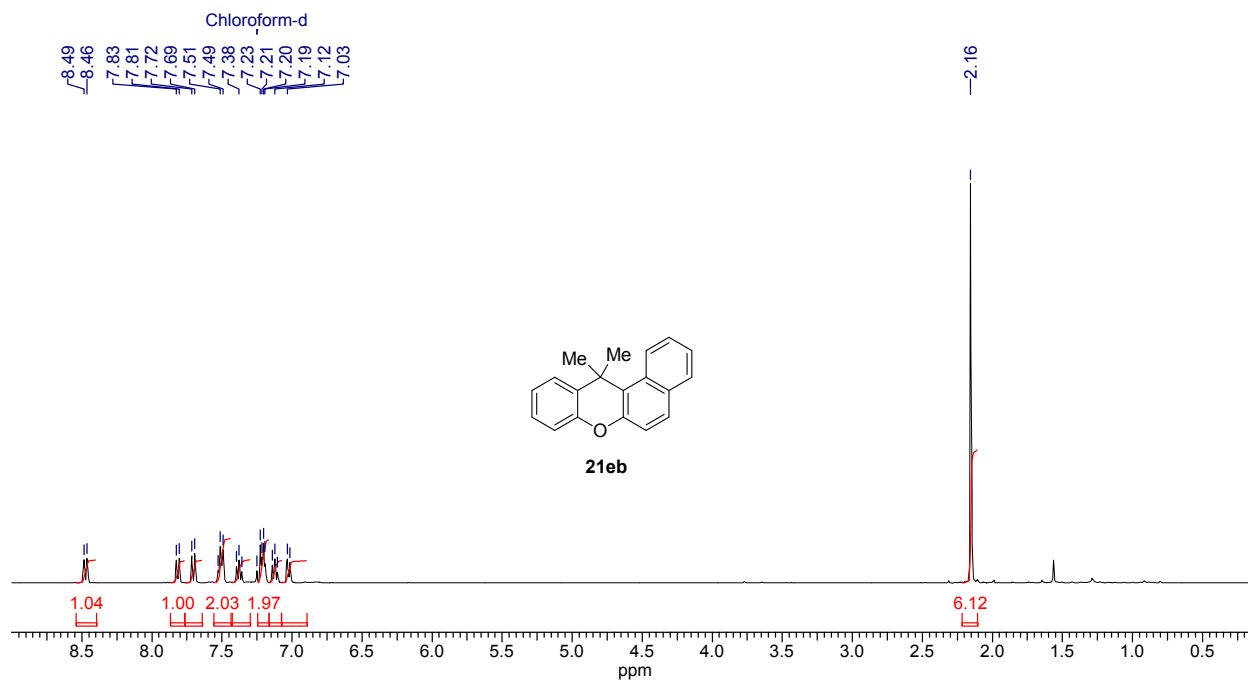

$^1\text{H}$  NMR (400 MHz) spectrum of **21eb** in  $\text{CDCl}_3$

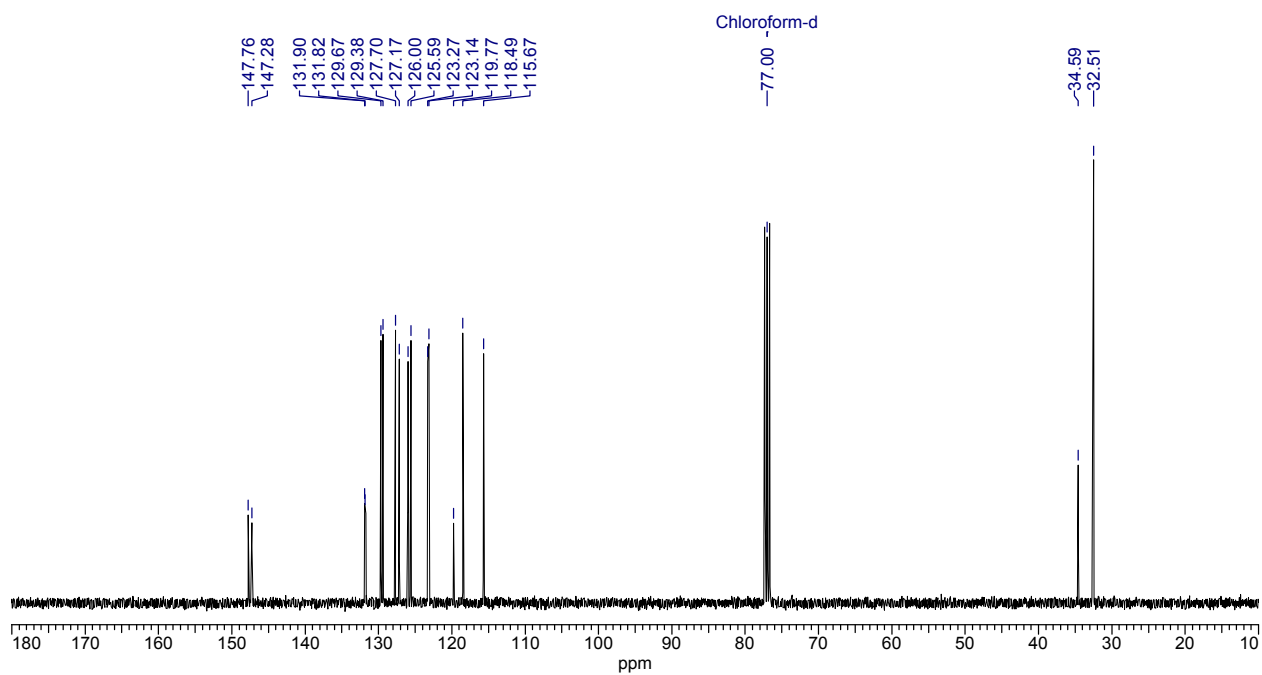

$^{13}\text{C}$  NMR (100 MHz) spectrum of **21eb** in  $\text{CDCl}_3$

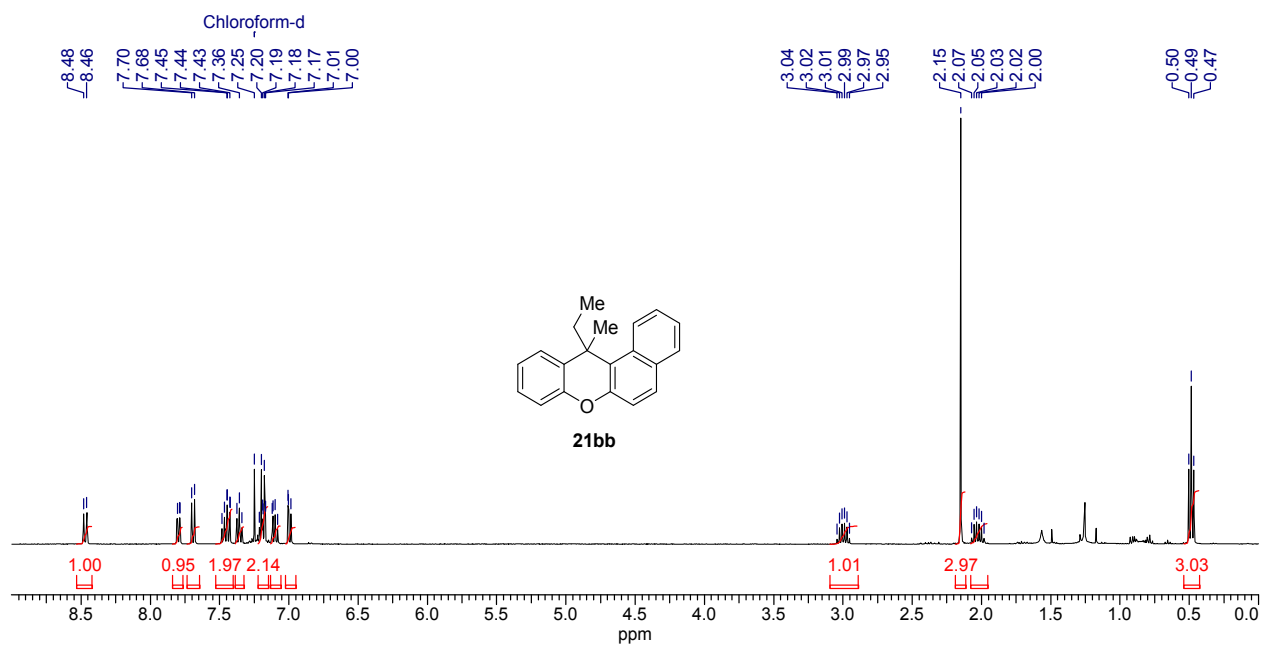

**1H NMR (400 MHz) spectrum of **21bb** in CDCl<sub>3</sub>**

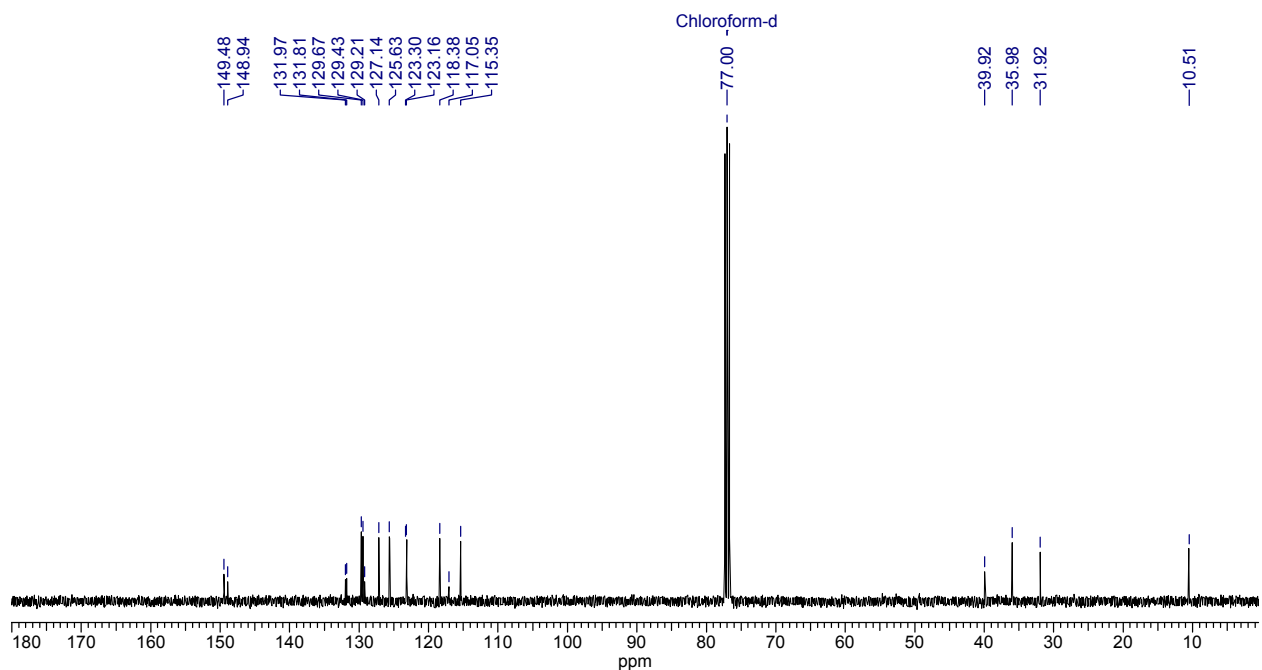

**13C NMR (100 MHz) spectrum of **21bb** in CDCl<sub>3</sub>**

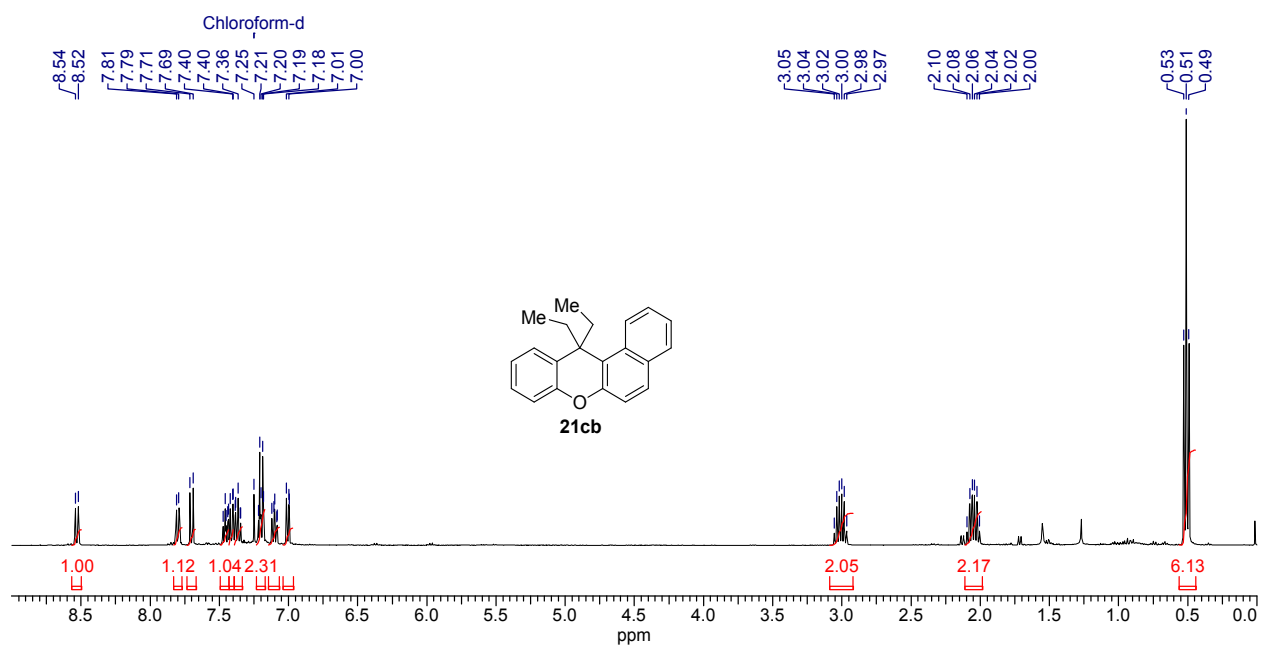

$^1\text{H}$  NMR (400 MHz) spectrum of **21cb** in  $\text{CDCl}_3$

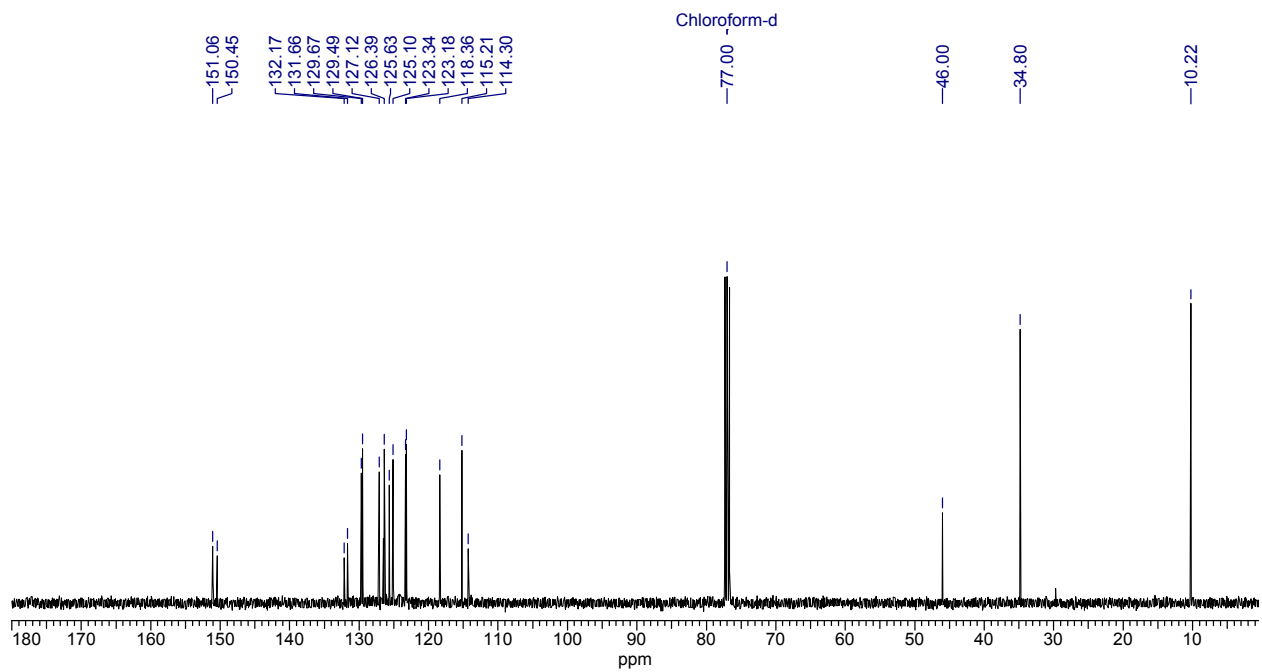

$^{13}\text{C}$  NMR (100 MHz) spectrum of **21cb** in  $\text{CDCl}_3$

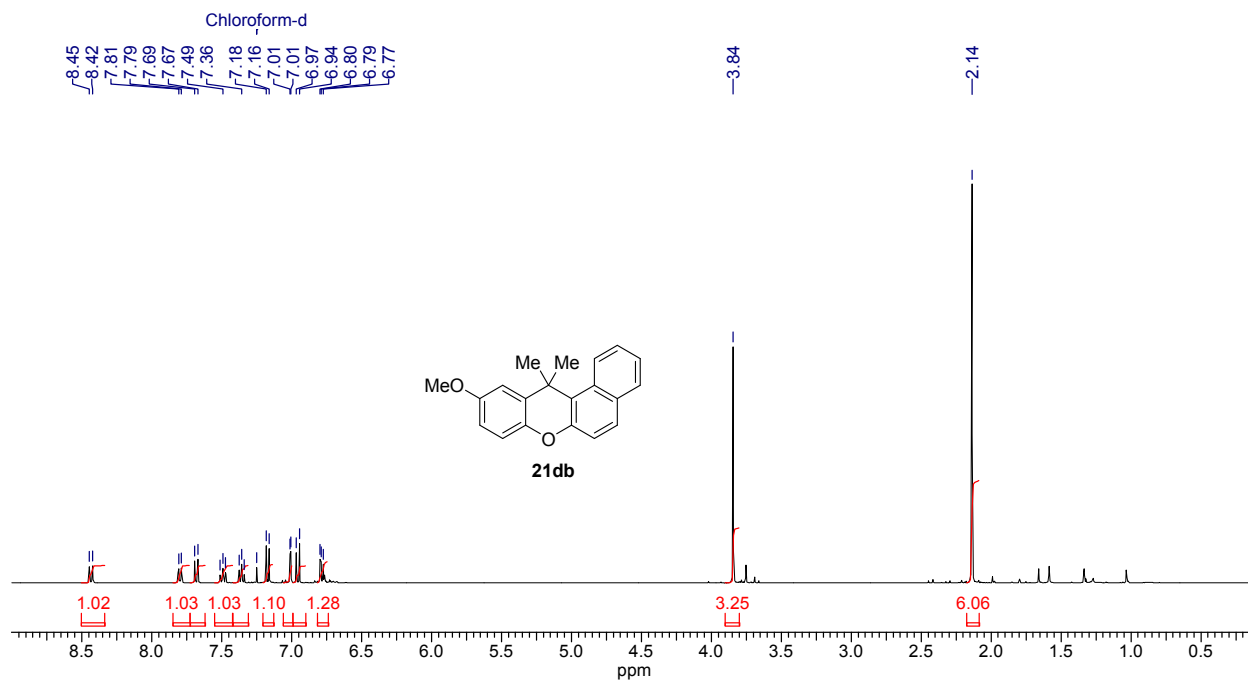

$^1\text{H}$  NMR (400 MHz) spectrum of **21db** in  $\text{CDCl}_3$

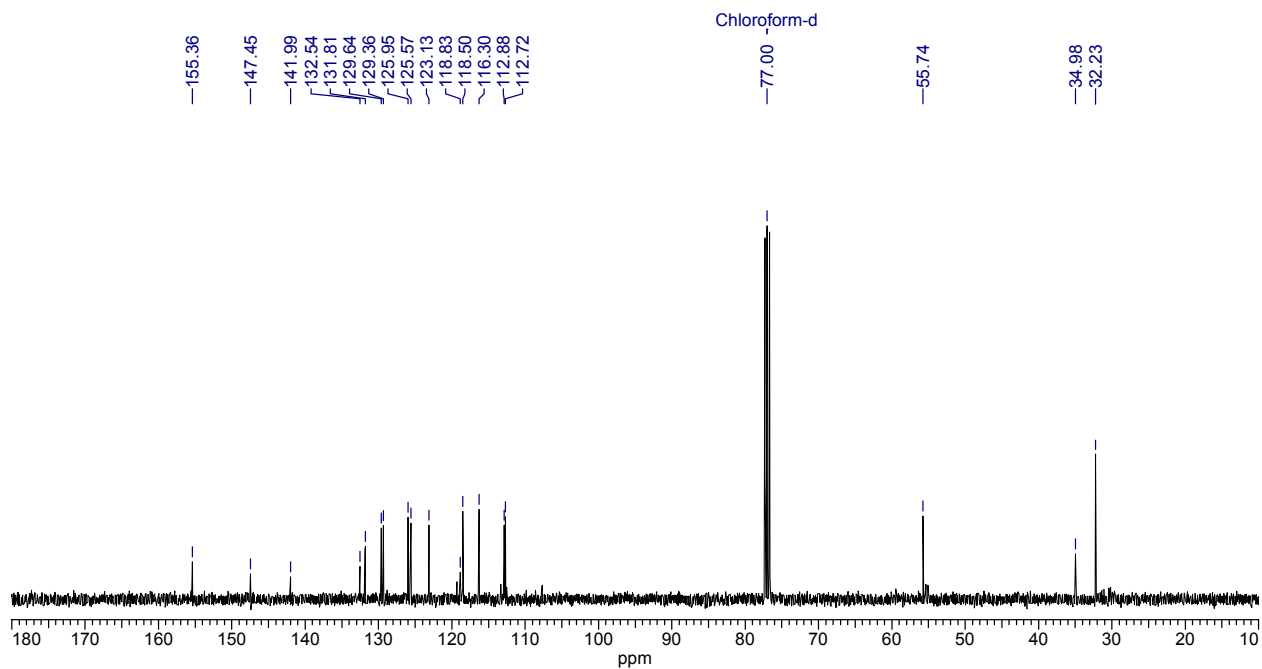

$^{13}\text{C}$  NMR (100 MHz) spectrum of **21db** in  $\text{CDCl}_3$

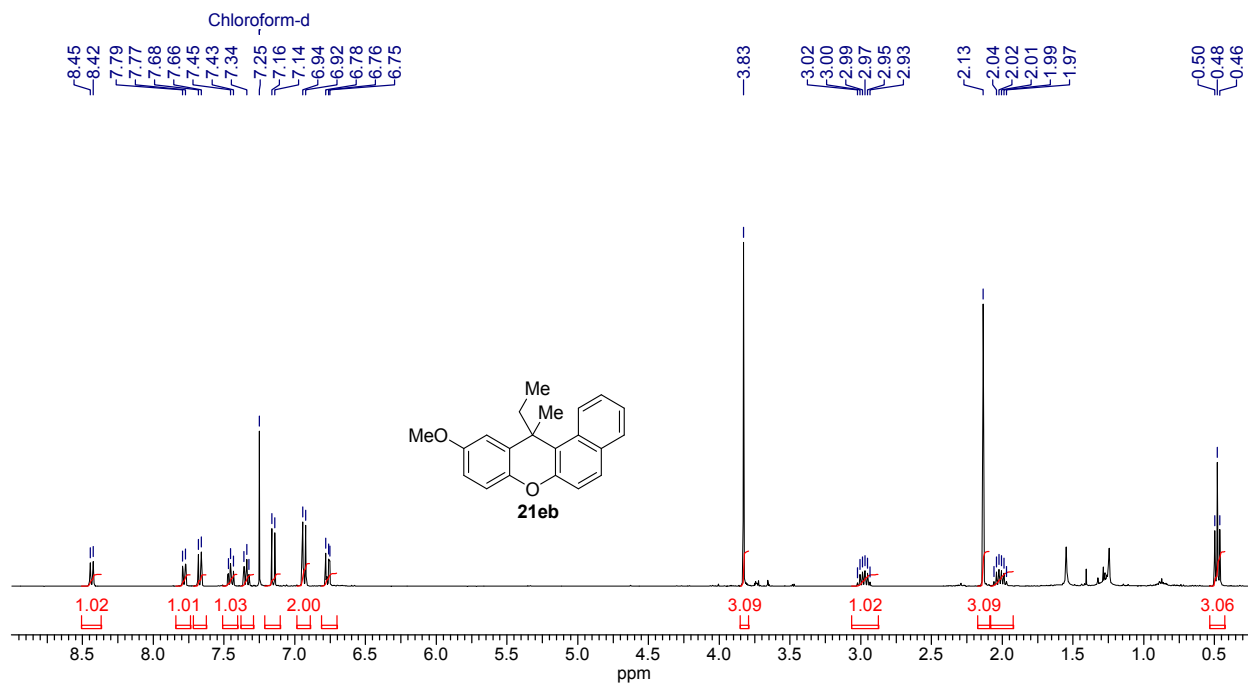

$^1\text{H}$  NMR (400 MHz) spectrum of **21eb** in  $\text{CDCl}_3$

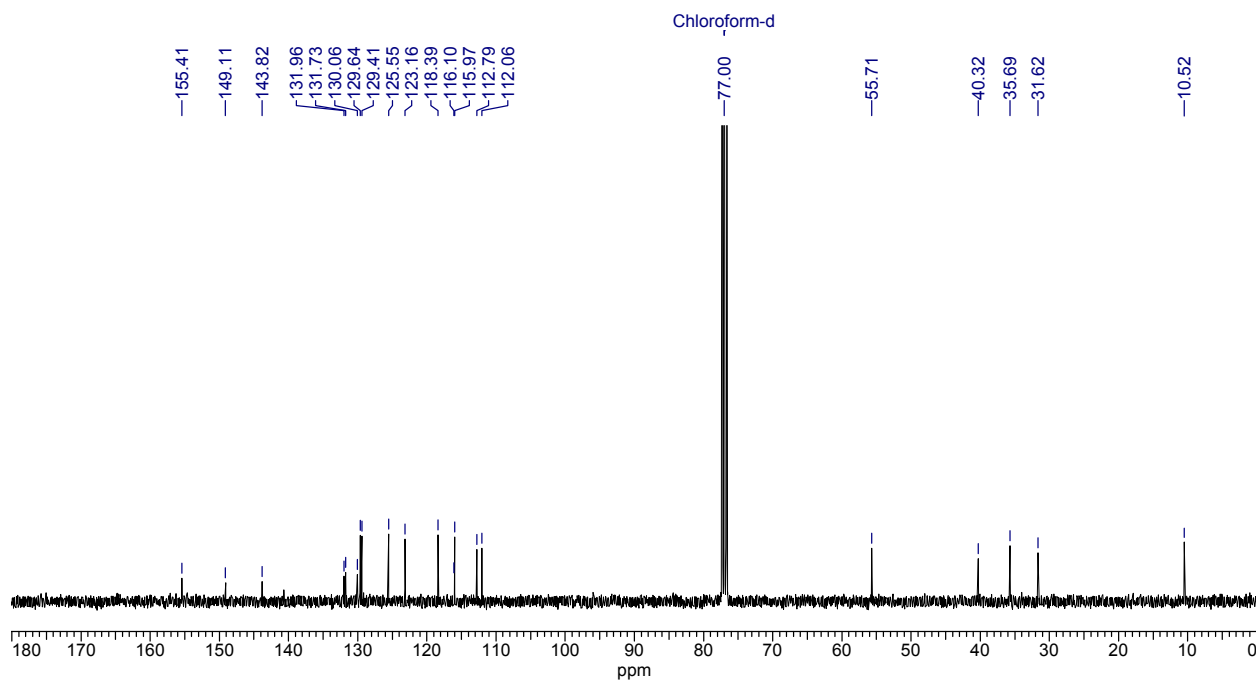

$^{13}\text{C}$  NMR (100 MHz) spectrum of **21eb** in  $\text{CDCl}_3$

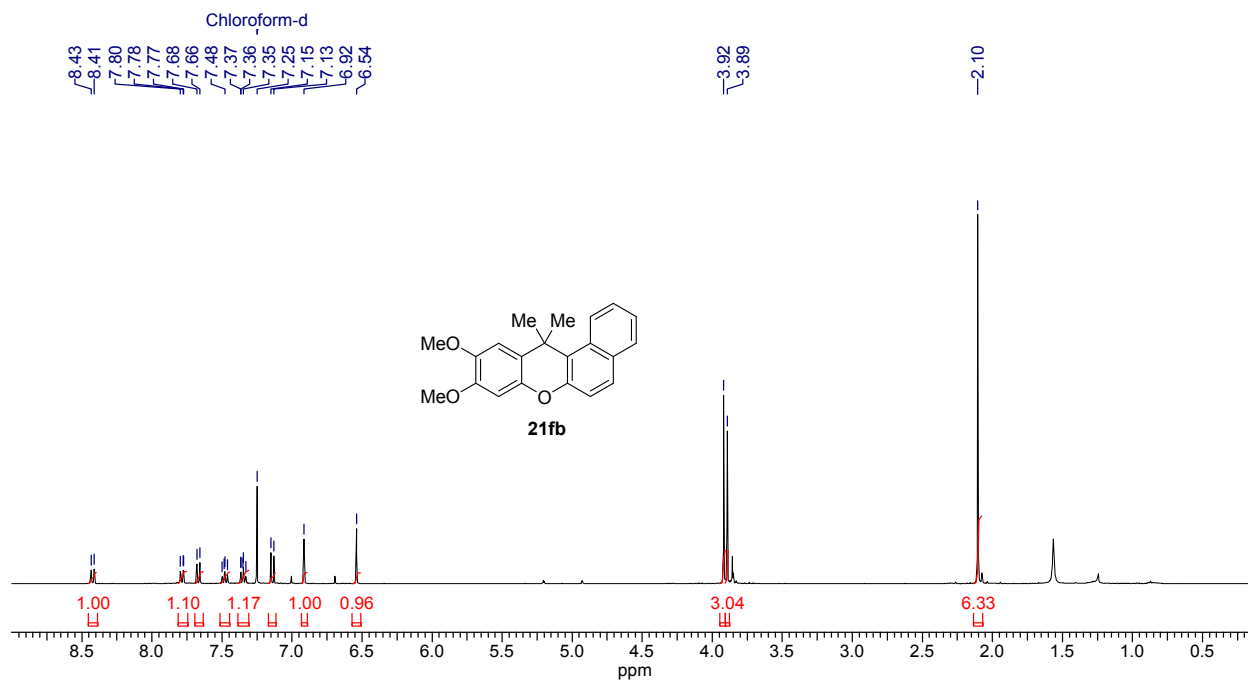

$^1\text{H}$  NMR (400 MHz) spectrum of **21fb** in  $\text{CDCl}_3$

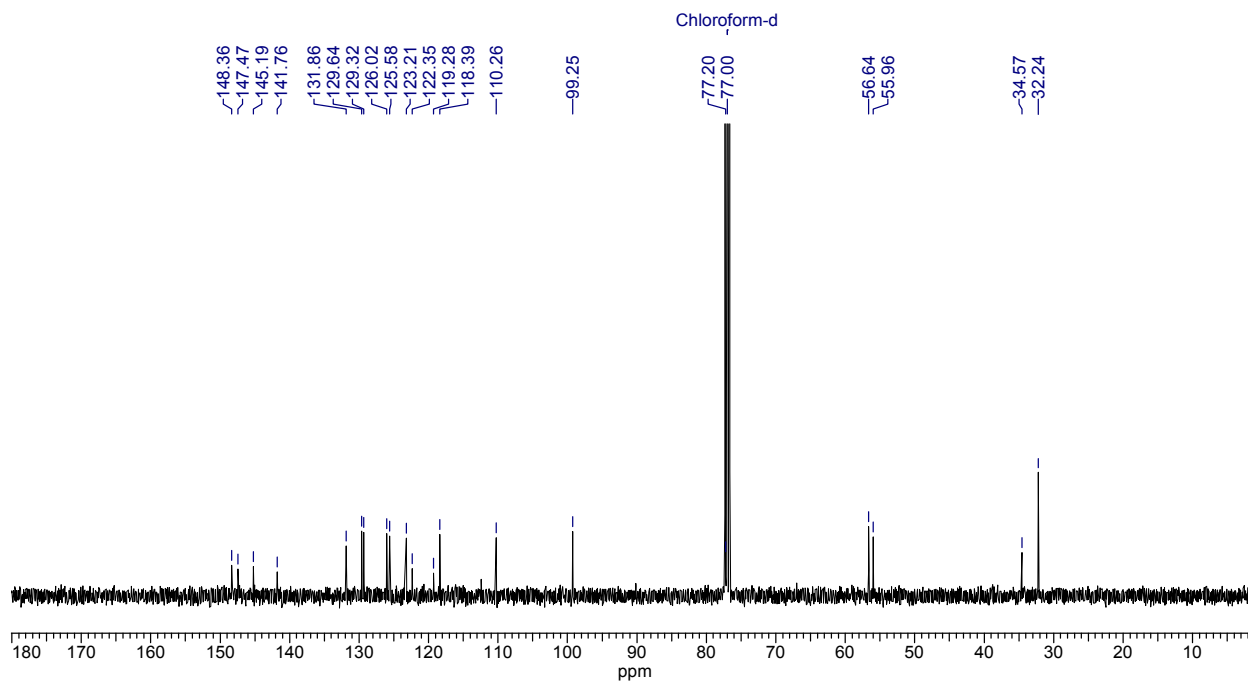

$^{13}\text{C}$  NMR (100 MHz) spectrum of **21fb** in  $\text{CDCl}_3$

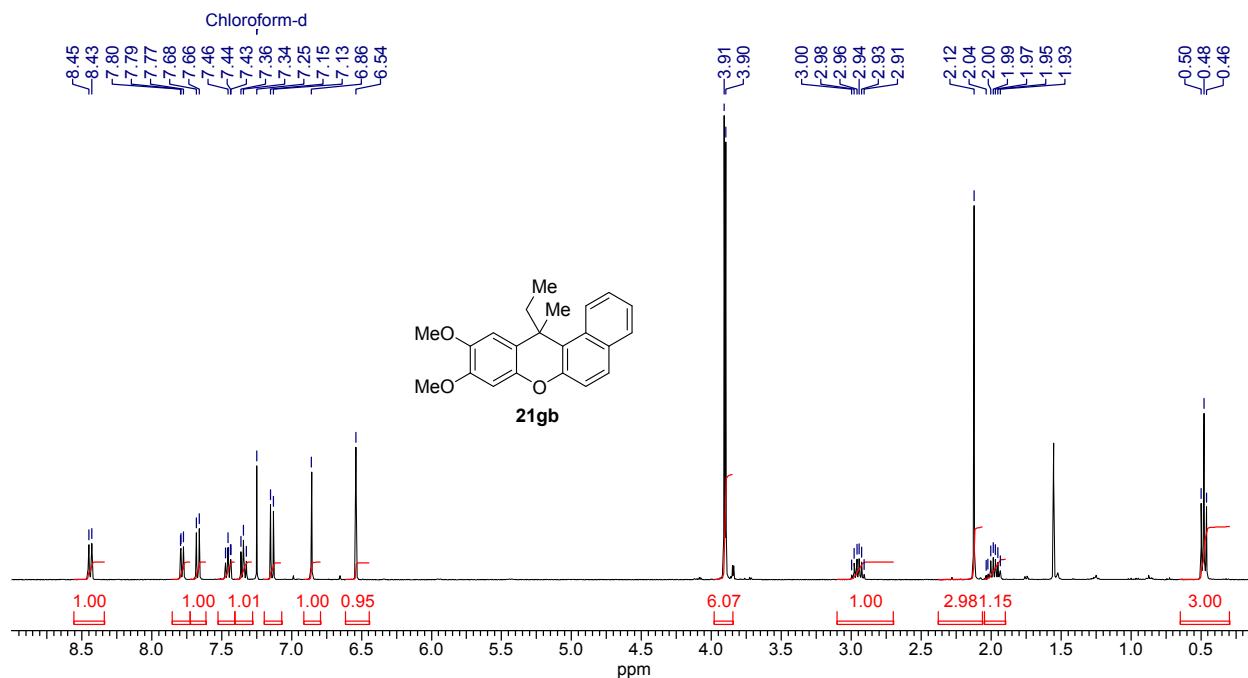

$^1\text{H}$  NMR (400 MHz) spectrum of **21gb** in  $\text{CDCl}_3$

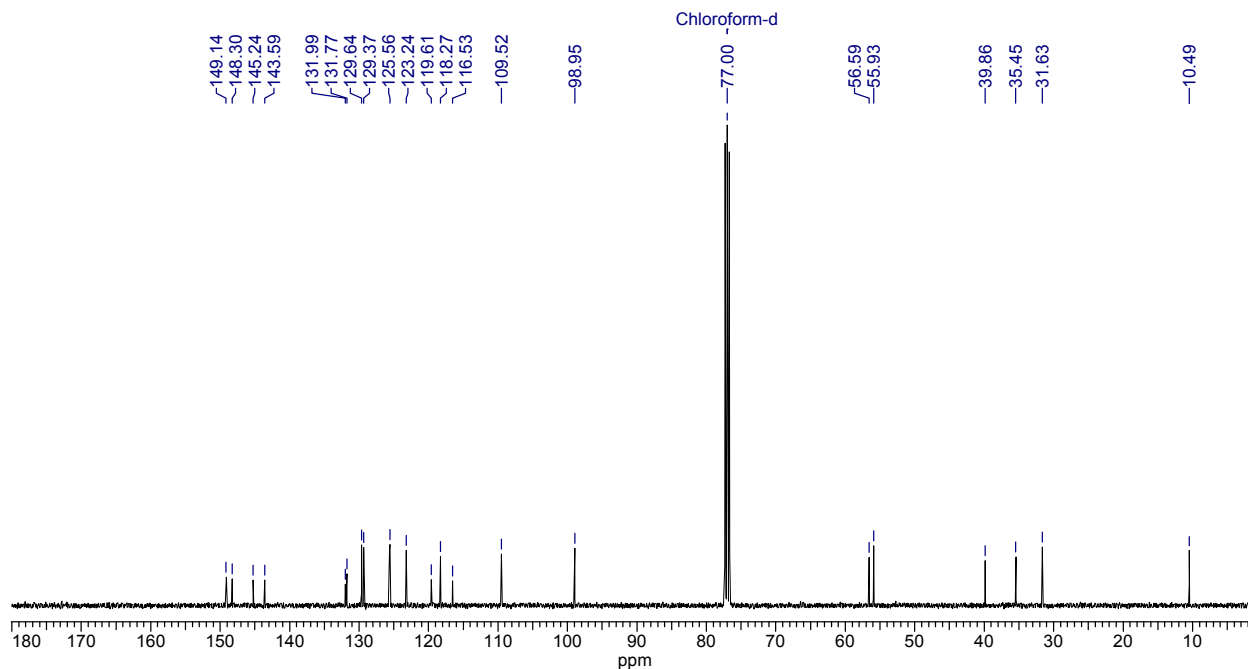

$^{13}\text{C}$  NMR (100 MHz) spectrum of **21gb** in  $\text{CDCl}_3$

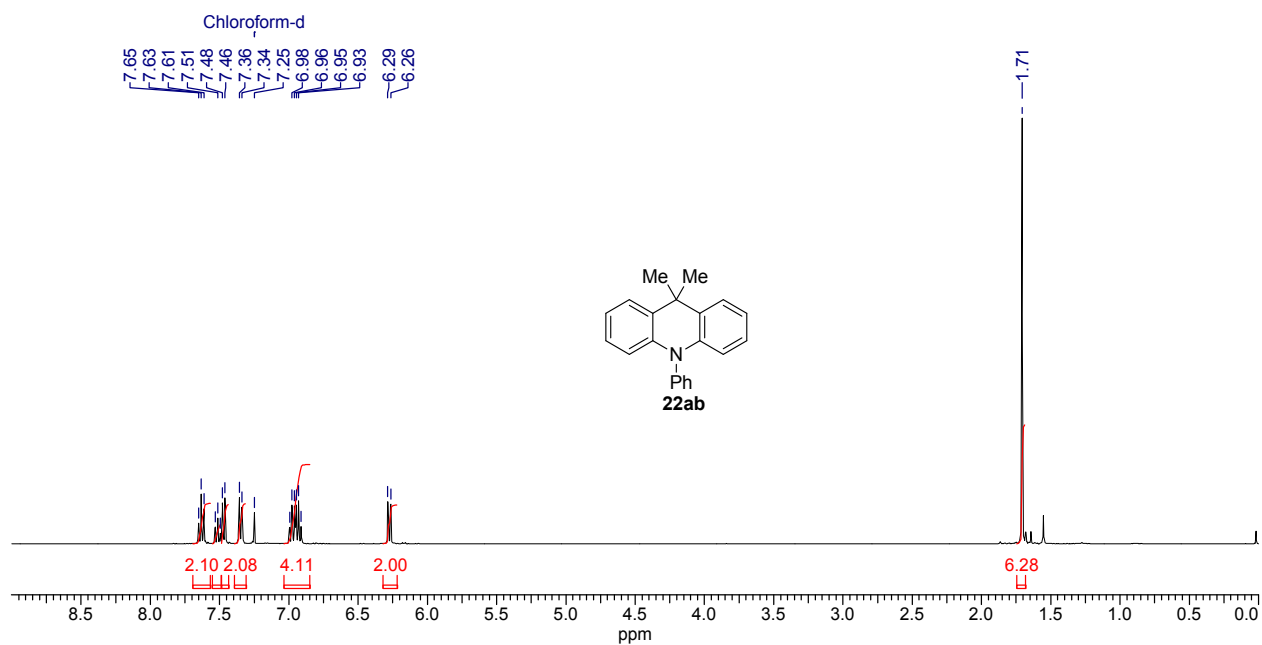

$^1\text{H}$  NMR (400 MHz) spectrum of **22ab** in  $\text{CDCl}_3$

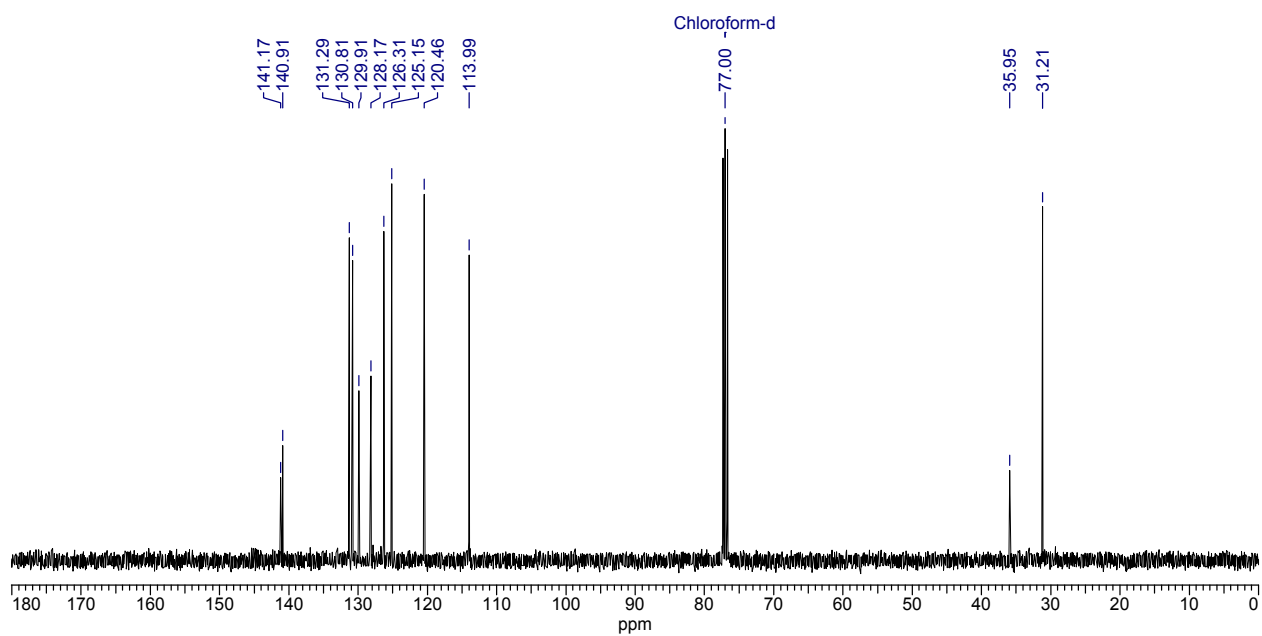

$^{13}\text{C}$  NMR (100 MHz) spectrum of **22ab** in  $\text{CDCl}_3$



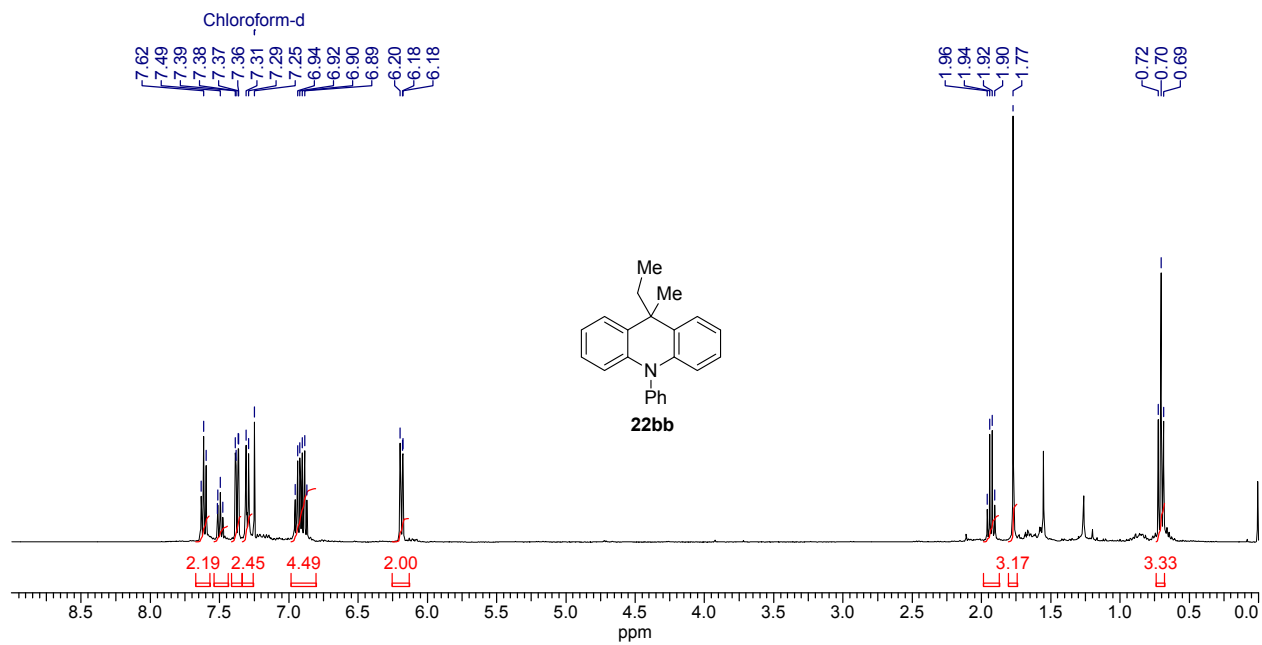

$^1\text{H}$  NMR (400 MHz) spectrum of **22bb** in  $\text{CDCl}_3$

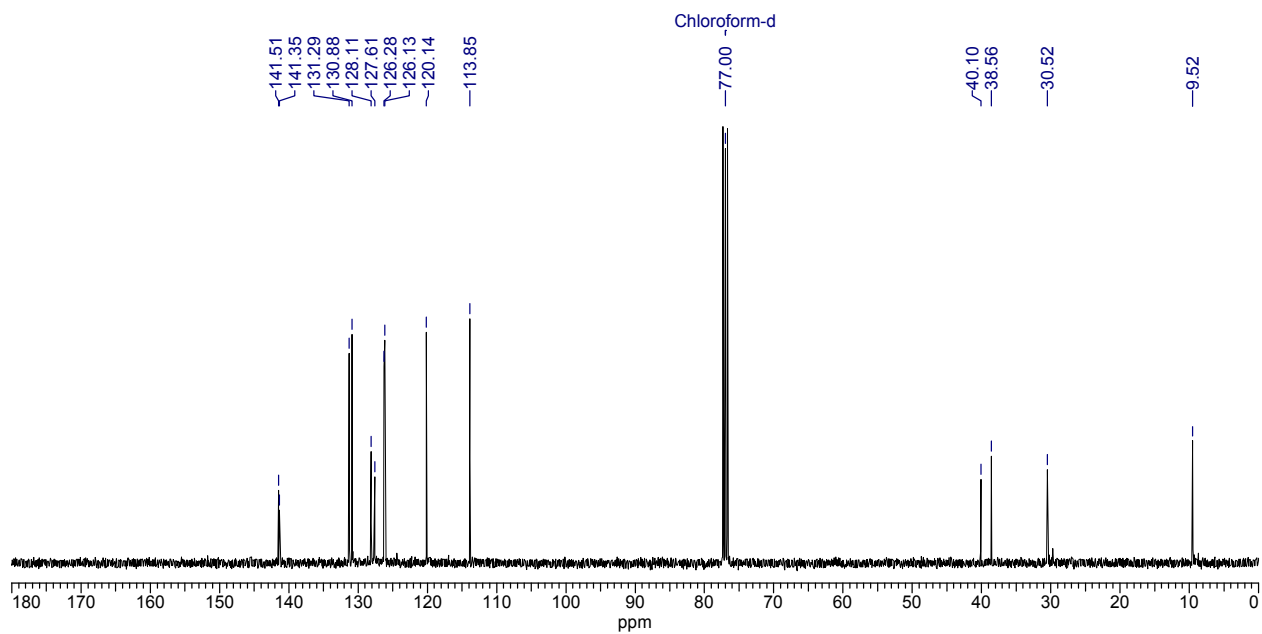

$^{13}\text{C}$  NMR (100 MHz) spectrum of **22bb** in  $\text{CDCl}_3$

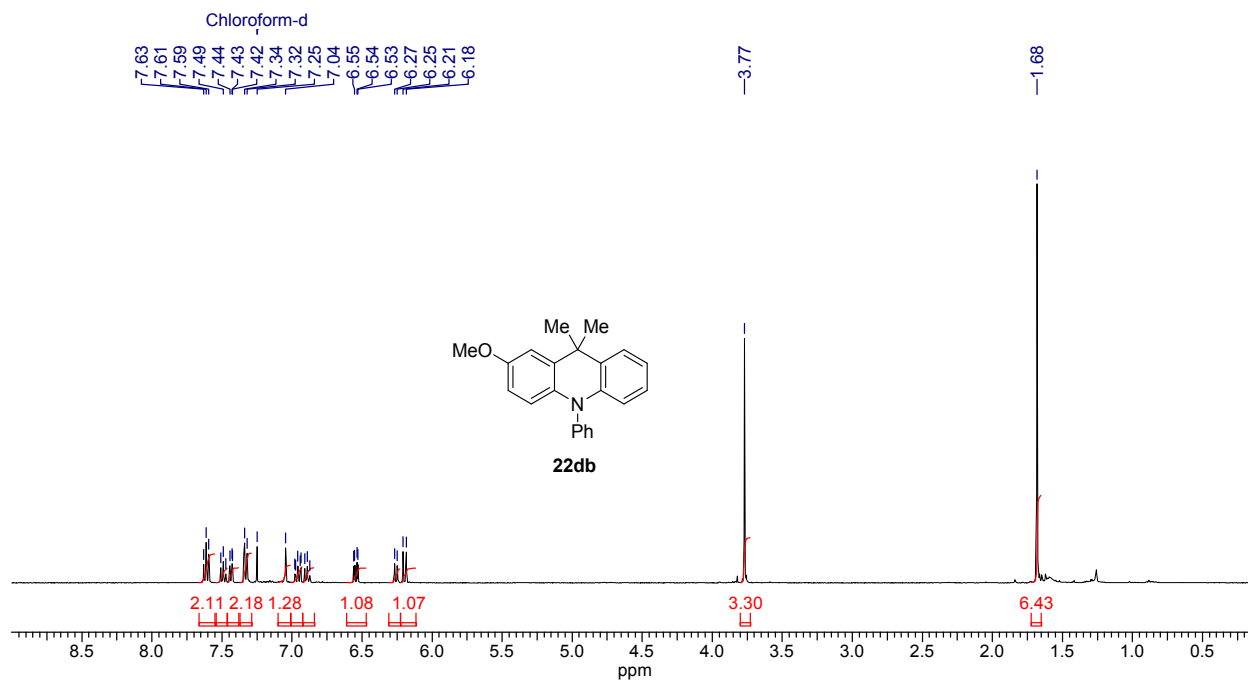

$^1\text{H}$  NMR (400 MHz) spectrum of **22db** in  $\text{CDCl}_3$

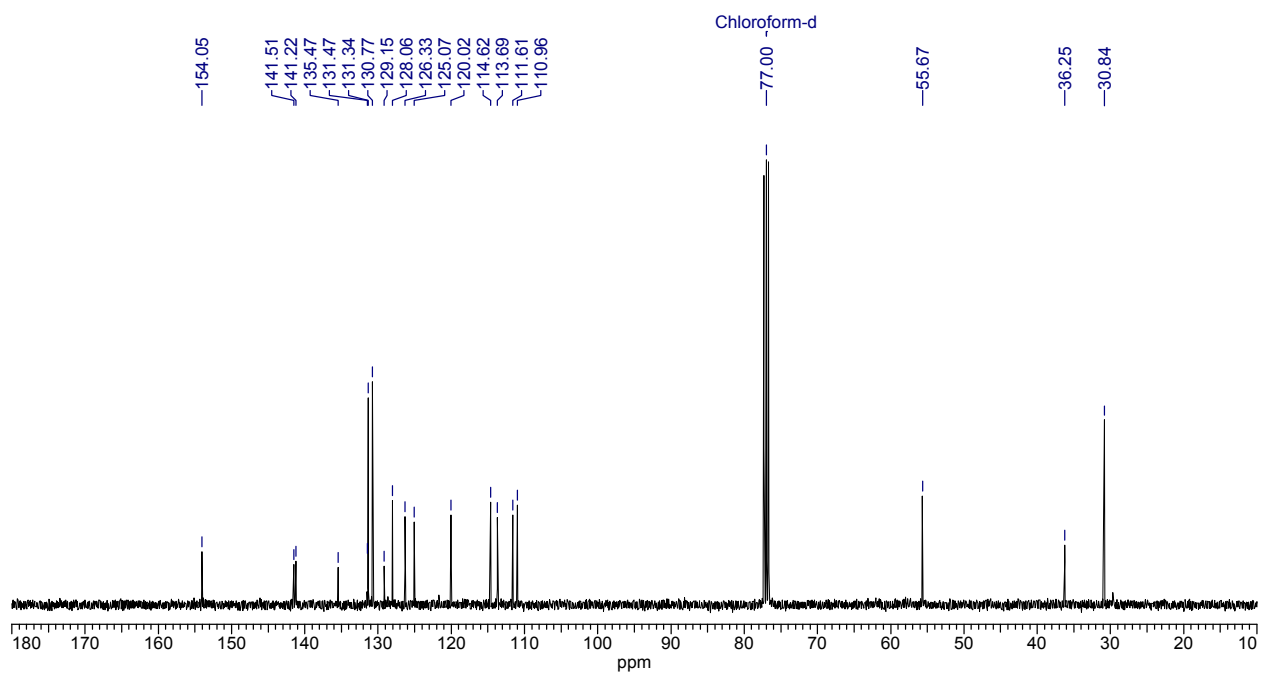

$^{13}\text{C}$  NMR (100 MHz) spectrum of **22db** in  $\text{CDCl}_3$

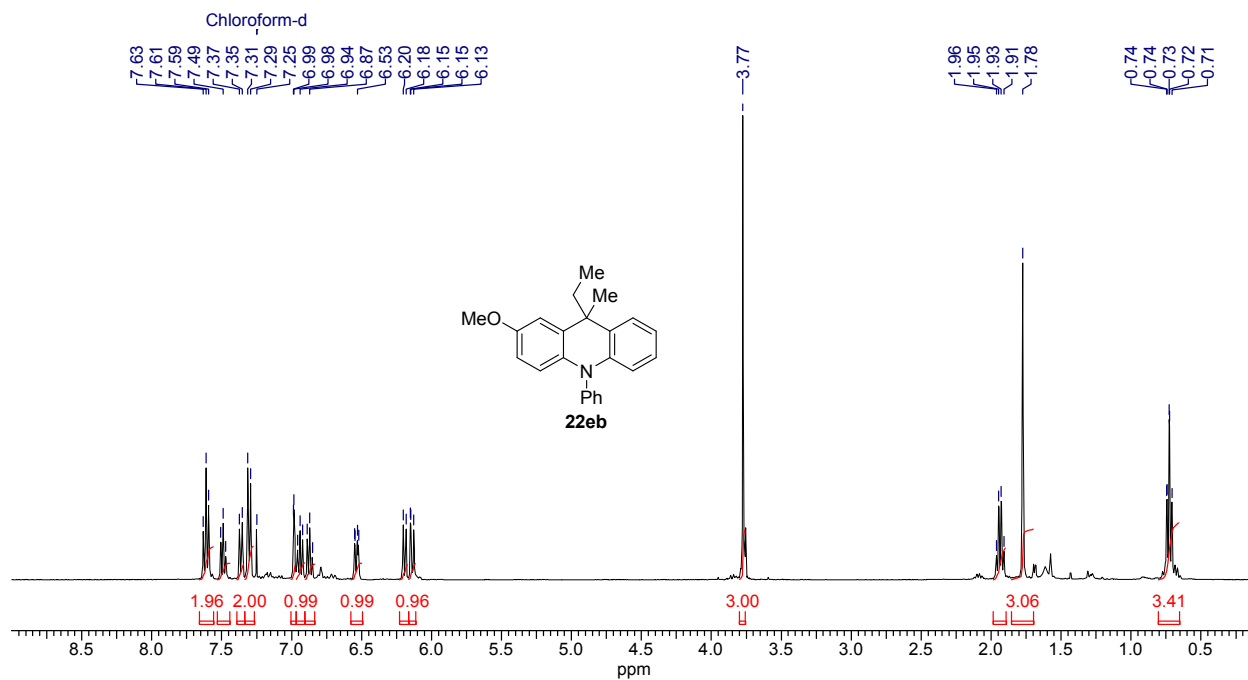

<sup>1</sup>H NMR (400 MHz) spectrum of **22eb** in CDCl<sub>3</sub>

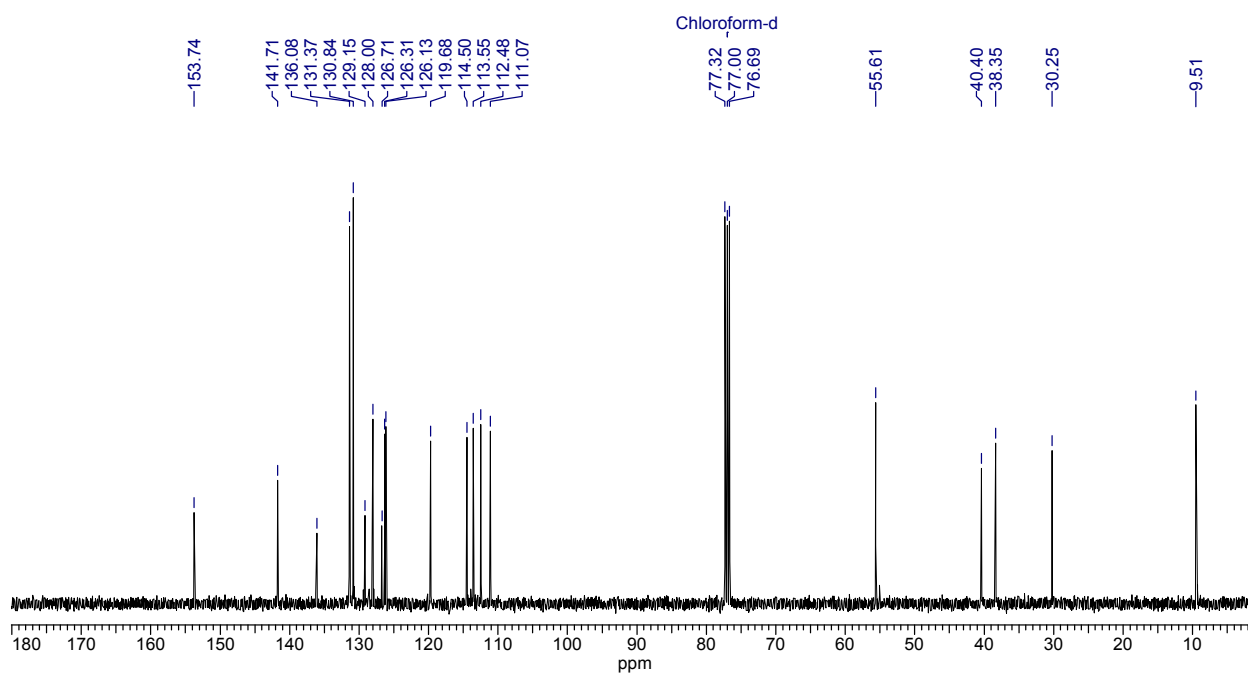

<sup>13</sup>C NMR (100 MHz) spectrum of **22eb** in CDCl<sub>3</sub>

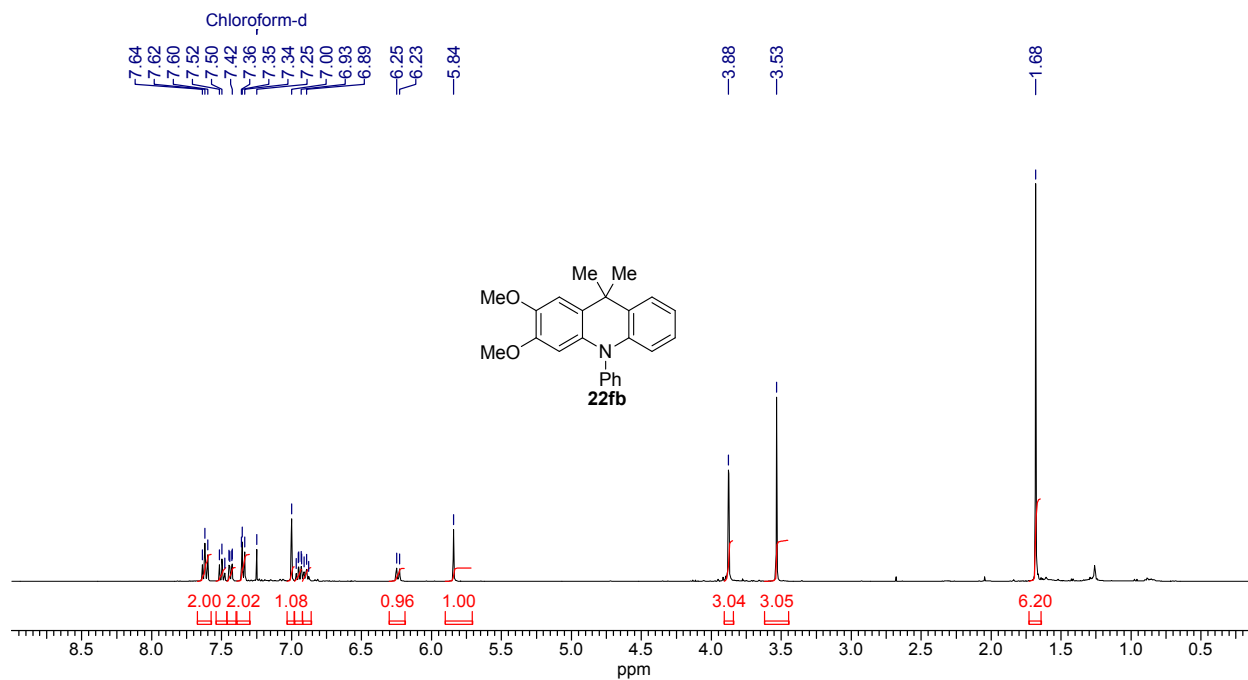

$^1\text{H}$  NMR (400 MHz) spectrum of **22fb** in  $\text{CDCl}_3$

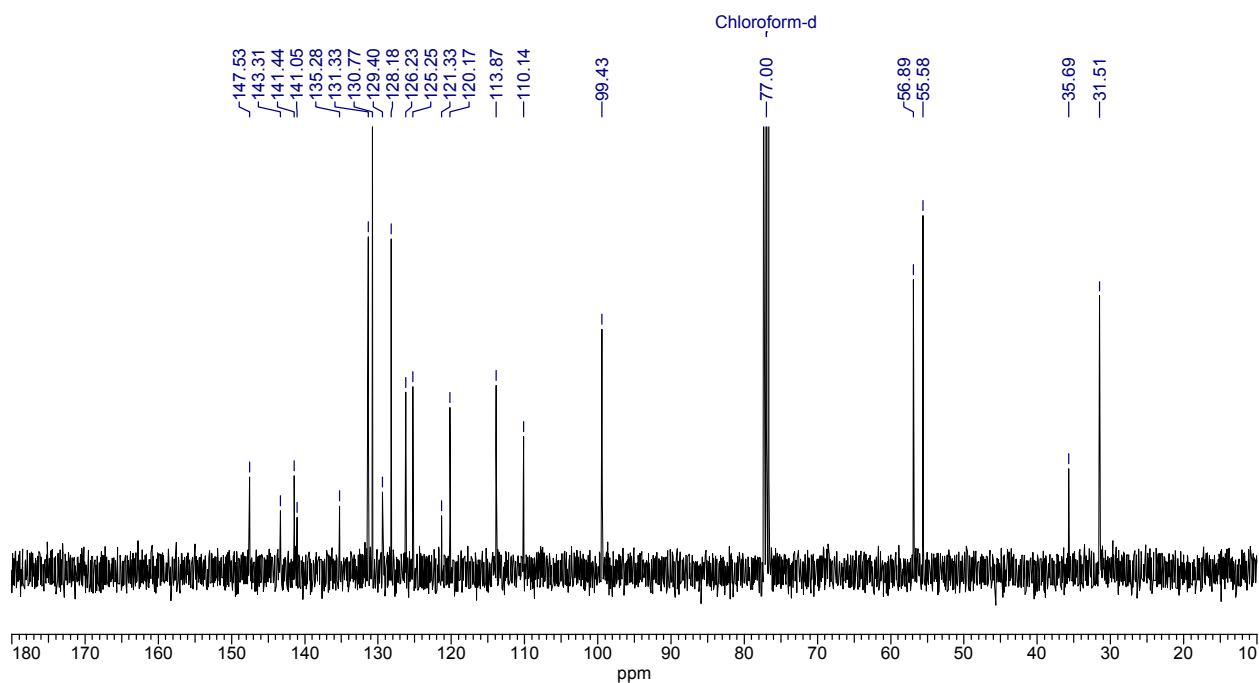

$^{13}\text{C}$  NMR (100 MHz) spectrum of **22fb** in  $\text{CDCl}_3$

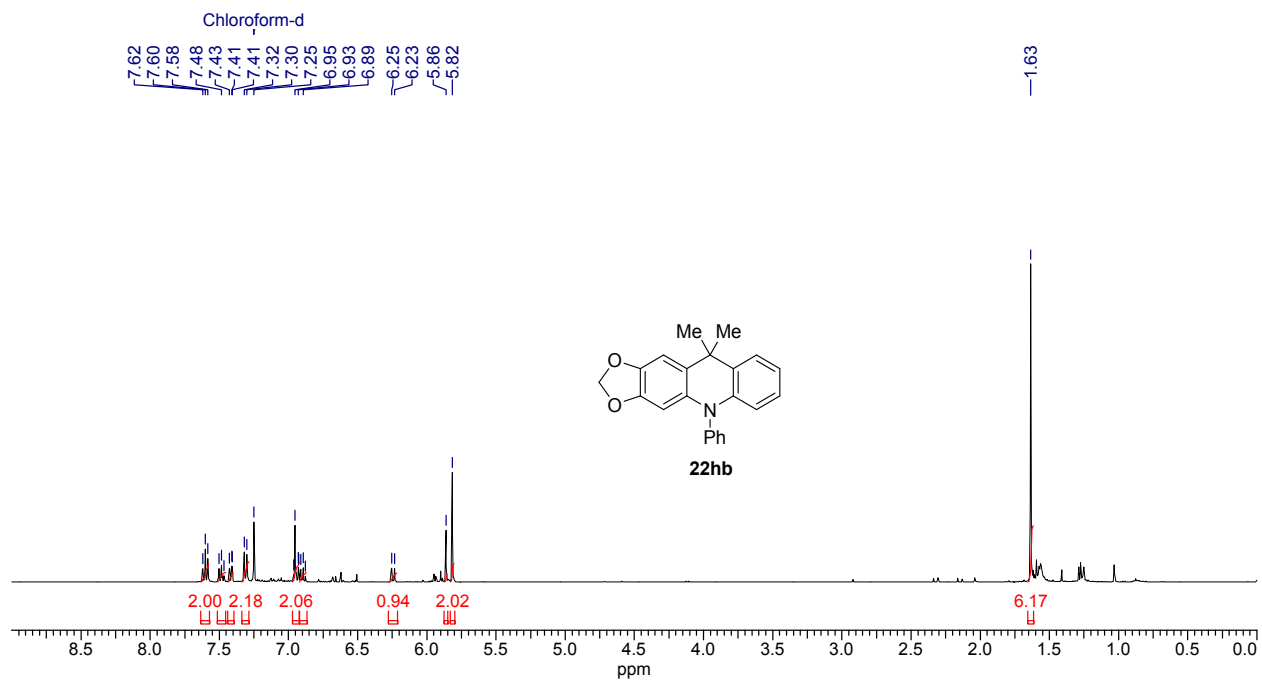

$^1\text{H}$  NMR (400 MHz) spectrum of **22hb** in  $\text{CDCl}_3$

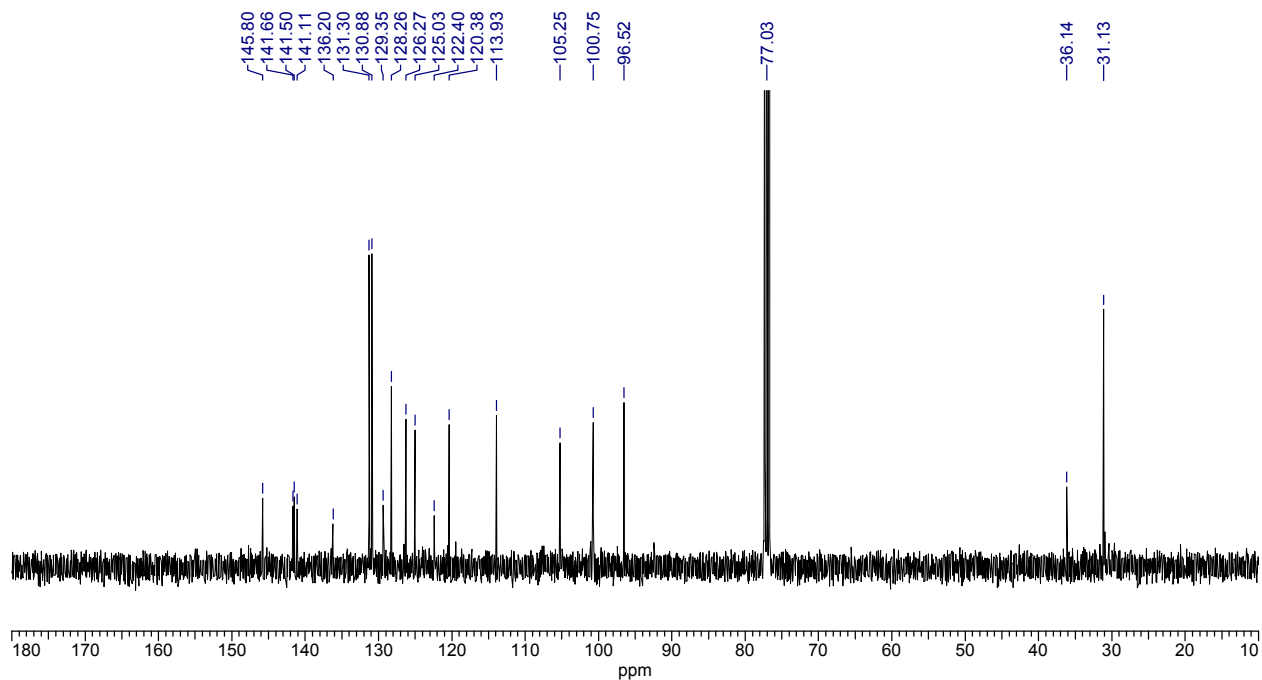

$^{13}\text{C}$  NMR (100 MHz) spectrum of **22hb** in  $\text{CDCl}_3$
